# Supplementary material
Source: Springer Nature journal article supplement (https://www.springermedizin.de/resource/supplementary/12887_2011_586_MOESM1_ESM.pdf/9475786)
Supplement: MOESM1 [file 9475786]

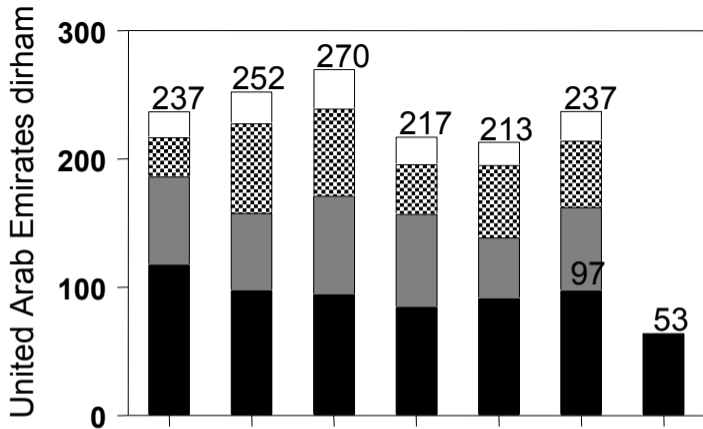

- Transportation
- Co-payments
- Self-paid medications
- Non-medical care

Medical care:

Yes

No

Age of Child (years)
